1 **Deciphering the genetic and transcriptional basis of cross-stress responses**  
2 **in *Escherichia coli* under complex evolutionary scenarios**

3 Violeta Zorraquino-Salvo <sup>1</sup>, Semarhy Quinones-Soto <sup>1</sup>, Minseung Kim <sup>2</sup>, Navneet Rai <sup>1</sup>, Ilias  
4 Tagkopoulos <sup>1,2</sup> §

5

6

7

8

9

10

11

12

13

14

15

16

17

18 <sup>1</sup>UC Davis Genome Center, University of California-Davis, Davis, CA, USA

19 <sup>2</sup>Department of Computer Science, University of California-Davis, Davis, CA, USA

20 § Corresponding author: Ilias Tagkopoulos, UC Davis Department of Computer Science and Genome  
21 Center, University of California, Davis, 95616 Davis, USA. Fax: +1 (530) 752-4767; Tel: +1 (530) 752-  
22 7707; E-mail: iliast@ucdavis.edu

23

24 **Abstract**

25 A tantalizing question in microbial physiology is the inter-dependence and evolutionary potential of  
26 cellular stress response across multiple environmental dimensions. To address this question, we  
27 comprehensively characterized the cross-stress behavior of wild-type and evolved *Escherichia coli*  
28 populations in five abiotic stresses (n-butanol, osmotic, alkaline, acidic, and oxidative) by performing  
29 genome-scale genetic, transcriptional and growth profiling, thus identifying 18 cases of cross-stress  
30 protection and one case of cross-stress vulnerability. We identified 18 cases of cross-stress protection  
31 and one case of cross-stress vulnerability, along with core and stress-specific networks. We tested  
32 several hypotheses regarding the effect of the stress order, stress combinations, mutation reversal and  
33 varying environments to the evolution and final cellular fitness of the respective populations. Our results  
34 argue of a common systems-level core of the stress response with several crucial implicated pathways  
35 that include metal ion binding and glycolysis/gluconeogenesis that is further complemented by a stress-  
36 specific expression program.

37 **Keywords: cross-stress protection / evolutionary trade-offs / microbial evolution / stress**  
38 **adaptation**

39

## 40 Introduction

41 Regardless of their complexity, organisms have developed a rich molecular and behavioral repertoire to  
42 cope with environmental variations in order to maintain homeostasis and cellular function. The term  
43 *stress* is used to describe conditions where environmental parameters differ substantially from an  
44 organism's optimal conditions for growth and for bacteria it has been an active area of research for  
45 decades<sup>1</sup>, given its industrial and medical importance. Most studies have focused on responses to single  
46 stressors, such as pH<sup>2-4</sup>, temperature<sup>5-7</sup>, oxidation<sup>8,9</sup> and UV<sup>10,11</sup>, thus providing an important insight  
47 on stress-related cellular responses and their underlying mechanisms. More recently, several studies  
48 have investigated cases of stress combinations and particularly of *cross-stress protection*, where  
49 exposure in a given stressor confers a fitness advantage against an exposure to a second stress<sup>12-23</sup>.

50 Evidence of cross-stress behavior has been mostly circumstantial so far and documented throughout the  
51 microbial kingdom. Early work on glucose- and nitrogen-starved *Escherichia coli* cells showed increase  
52 survival rates after heat shock or hydrogen peroxide-mediated stress when compared to non-stressed  
53 cells<sup>24</sup>, with the alternative sigma factor *rpoH* a crucial link for heat shock protein production during  
54 starvation stress<sup>25</sup>. *E. coli* cells adapted to high ethanol concentrations had decreased growth under  
55 acidic stress<sup>26</sup> and high temperature environments induce a similar transcriptional program to that  
56 observed under low oxygen<sup>27</sup>. Pre-adaptation to elevated temperature can reduce both cell death rate  
57 and mutation frequency caused by hydrogen peroxide in *Lactobacillus plantarum*<sup>28</sup>. Osmotic stress was  
58 found to confer inducible heat tolerance in *Salmonella typhimurium*<sup>15</sup>, while trehalose synthesis, which  
59 is important for osmoprotection, was shown to feature a heat-inducible component that increases heat  
60 tolerance of osmo-adapted *Salmonella enterica* cells<sup>14</sup>. More recently, gene-deletion libraries were used  
61 to investigate hydrogen peroxide (H<sub>2</sub>O<sub>2</sub>) tolerance in yeast<sup>29</sup>.

62 The emergence of cross-stress behavior and the impact of the environmental correlation-structure during  
63 its evolution remain tantalizing questions that need to be further investigated. In a recent study, the  
64 fitness of *E. coli* populations in five stressors was measured after adaptation for 500 generations under  
65 various other stressors and cross-stress dependencies were found to be ubiquitous, highly interconnected  
66 and emerging within short timeframes<sup>30,26,28</sup>. While studies like that provide valuable insights on the  
67 evolutionary potential of cross-stress behavior, our knowledge of static cross-stress dependencies as well  
68 as the effect of specific environmental characteristics to their dynamic, evolutionary potential remains  
69 limited. Environmental structure is known to be important for the trait evolution during periodic

70 fluctuations<sup>31-33</sup>, co-evolution in microbial communities<sup>34</sup> and can influence the rate and direction of  
71 evolution. Additionally, cross-stress responses may be dependent on the type of co-evolution or the  
72 order of exposure to the pair of stresses, while it is not clear if and in which cases, evolved mutants  
73 revert to wild-type phenotypes in the prolonged absence of the stressor.

74 In this study, we have constructed a comprehensive map of cross-stress behavior by measuring the  
75 population fitness in pair-wise stress combinations for five stressors (osmotic, oxidative, alkaline, acidic,  
76 *n*-butanol) that are biotechnologically and biologically important<sup>3,9,35-37</sup>. By performing genome-wide  
77 transcriptional profiling for each case, we identified key genes and pathways that are implicated in this  
78 phenomenon (**Figure 1A**). We then compared the observed cross-stress response arising from a short-  
79 term exposure to sequential combination of stresses to the response resulting from a longer term  
80 evolution of several *E. coli* lineages over 500 generations under the respective stressors. We identified  
81 the genetic basis of these differences by genome-wide re-sequencing of the mutants. Several hypotheses  
82 related to the stress order, stress combinations, mutation reversal and evolution in varying environments  
83 were tested through further evolving cells already adapted to *n*-butanol and osmotic to a total of 1000  
84 generations under the respective conditions (**Figure 1B**). Fitness assessment and re-sequencing of the  
85 evolved strains provide insight on the genetic basis of acquired stress resistance and cross-behavior,  
86 while functional analysis highlight pathways that play a central role in this phenomenon.

87

## 88 Results

### 89 Comprehensive map of the cross-stress behavior in *E. coli*:

90 We tested the cross-stress behavior of *E. coli* MG1655 cells in all the possible pair combinations across  
91 five stressful environments (*n*-butanol, osmotic, acidic, alkaline and oxidative, four biological and two  
92 technical replicates). Out of the 25 possible combinations, 18 pairs (72%) have significant cross-stress  
93 behavior which is in accordance with the presence of a general stress response in *E. coli* (**Figure 2A**,  
94 **Supplementary Table S2, Supplementary File S1**). The highest cross-protection was observed when  
95 bacteria were exposed to acidic stress prior to *n*-butanol stress (DF =  $1.15 \pm 0.04$ , *p*-value <  $1.46 \cdot 10^{-3}$ ).  
96 We only detected one significant case of cross vulnerability, in the case of bacteria moved from  
97 oxidative to acid stress (DF =  $0.97 \pm 0.01$ , *p*-value <  $1.91 \cdot 10^{-4}$ ). We found a significant cross-protection  
98 effect between acidic media and high salt stress (DF =  $1.10 \pm 0.02$ , *p*-value <  $5.17 \cdot 10^{-4}$ ), which is a  
99 cross-stress behavior that previous studies found to be inconclusive in *E. coli* cells<sup>16,38</sup> but is known to  
100 occur in *S. typhimurium*<sup>18</sup>. We also detected a cross-protection similar to that described for *S.*  
101 *typhimurium* and *Listeria monocytogenes*<sup>13,15</sup> between osmotic and oxidative stresses (DF =  $1.14 \pm$   
102  $0.02$ , *p*-value <  $6.41 \cdot 10^{-3}$ ).

103  
104 A cross-protection was observed in bacteria adapted to either high salt concentration or *n*-butanol and  
105 then exposed to oxidative stress (DF =  $1.14 \pm 0.02$ , *p*-value <  $6.41 \cdot 10^{-3}$  and DF =  $1.14 \pm 0.02$ , *p*-value <  
106  $0.02$ , respectively). A recent study has identified cross-stress vulnerability for these two combinations<sup>39</sup>,  
107 however in that case, *E. coli* was evolved for 500 generations in the first stress, hence accumulating  
108 mutations that can alter its cross-stress profile with respect to the ancestral line. Indeed, we found that  
109 evolved and un-evolved cell lines had significantly different behaviors in both the original growth media  
110 and the stress-induced M9 media supplemented with 100 mM H<sub>2</sub>O<sub>2</sub> (**Supplementary Figures S1 and**  
111 **S2**).

112  
113 In both presence of *n*-butanol and oxidative stresses, a first exposure to 4 out of the 5 stresses gives a  
114 selective advantage to the bacteria. Pre-adaptation to other stresses except acidic provides a fitness  
115 advantage in the oxidative environment, partially analogous to what has been described for *L.*  
116 *monocytogenes*<sup>19</sup>. Surprisingly, in acidic stress we have observed the least cross-stress protection from  
117 all the other conditioned strains and we also observed the sole case of cross-stress vulnerability in the

118 case of the oxidative-adapted strains (**Figure 2A**). On the other hand, bacteria adapted in low pH are  
119 well-positioned to compete in all other stresses. To quantify the degree of positive or negative cross-  
120 stress behavior, we introduce *cross-stress plots* (**Figure 2B**) where the acid-conditioned cells possess the  
121 highest area of cross-stress protection (0.922), while oxidative-conditioned cells have the lowest area  
122 (0.411) that also harbors the sole case of cross-stress vulnerability.

123

### 124 **Transcriptional profiles associated to cross-stress behavior**

125 To analyze the underlying mechanism of cross-stress behavior we performed two types of  
126 transcriptional analysis. First, we performed a transcriptional profiling for each individual stressor at  
127 samples harvested 12 hours after exposure. Then we analyzed the transcriptional profiles after exposure  
128 to the second stressor (24 hours) to identify the differentially expressed (DE) genes in the various cross-  
129 stress samples (**Supplementary Tables S3-5, Supplementary File S2**).

130

131 In the case of the genes differentially regulated in each stress, we identified 41, 203, 111 and 21 DE  
132 genes (*p-value* < 0.05 after Bonferroni correction) for *n*-butanol, osmotic, oxidative and acidic stress  
133 respectively. For each stress we merged results of the four different analysis (**Supplementary Figure**  
134 **S3**) and then data for each stress was used to make a new analysis that identifies DE found in more than  
135 one stress (**Figure 3A**). Interestingly, in acidic environments 18 of the 21 DEGs found (86%) overlap  
136 with other stresses that correlates well with the fact that this specific environment has the highest cross-  
137 stress area.

138

139 In osmotic and *n*-butanol stresses there is an under-expression of two operons, *nar* and *hya*, both  
140 reported to be over-expressed in anaerobiosis<sup>40,41</sup>. The *hya* operon was also down-regulated under  
141 oxidative stress when compared to its expression under control conditions. The operon encodes for the  
142 synthesis of a hydrogenase that is implicated in pH stabilizing responses<sup>41</sup>. The *gadE*, *gadB* genes from  
143 acidic resistance system AR2, the *adiA* gene from AR3 and the *hdeAB* acidic response<sup>42-45</sup> were found  
144 to be under-expressed under the osmotic and *n*-butanol stressor when compared to their expression in  
145 the absence of a stressor. As expected, the acidic resistance gene *gadB* is overexpressed under acidic  
146 stress conditions. We have identified both a common core of DEG for stress combinations and top  
147 ranked genes for individual stresses (**Supplementary Table S6, Supplementary File S2**). In osmotic  
148 stress, *proX* that belongs to the operon that encodes for osmoprotectant transportation is significantly

149 overexpressed<sup>46,47</sup>, while in oxidative stress we have high expression of the *yhjA* and *pfkA* genes. The  
150 first is a the *oxyR*-regulated peroxidase<sup>48</sup> while the second is of unknown function and we have recently  
151 showed that it is implicated with H<sub>2</sub>O<sub>2</sub> sensitivity<sup>49</sup>. Surprisingly, the highest ranked DEGs for *n*-  
152 butanol are the whole *hya* operon and the *gadB* gene, which are both related to acidic resistance. Indeed,  
153 culture in *n*-butanol was found to lower the pH to 5.9 after 12h, which explains the up-regulation of the  
154 acidic-stress cluster and the resulting cross-stress protection that was observed in this study.

155

156 To measure transcriptional changes in the profiles for both cross-stress protection and vulnerability  
157 cases, we performed RNA-Seq on four stress combinations: cells adapted to osmotic stress and then  
158 exposed to *n*-butanol (cross-stress protection) and cells adapted in oxidative stress that were  
159 subsequently exposed to acidic stress (cross-stress vulnerability) and their complementary pairs (from *n*-  
160 butanol to osmotic stress and from acidic to oxidative) to identify whether the observed difference in  
161 Darwinian Fitness can be attributed to the enactment of a dissimilar transcriptional program. Two  
162 controls were used as reference: cells grown for 12 hours in M9 and then 12 hours in the second stress  
163 and a population that has been exposed to the second stress continuously for 24 hours (**Figure 3B**). In all  
164 the analyses DEGs are similar when compared to both references, except from acidic to oxidative stress  
165 (**Supplementary File S2**). When bacteria were exposed to *n*-butanol stress after being exposed to  
166 osmotic stress, there is only a small variation of expression compared to the bacteria that have been only  
167 exposed to *n*-butanol (9 DEGs only) showing that exposure to high salt conditions triggers a response  
168 similar to the response of bacteria exposed to *n*-butanol and no rewiring is needed giving the bacteria an  
169 advantage. Most of these 9 DEGs are acidic-response genes as found in the *n*-butanol samples like *gadB*  
170 and *gadE* (**Supplementary Table S7, Supplementary File S2**). In contrast, when bacteria that has  
171 adapted in *n*-butanol face osmotic stress, more than 100 genes are differentially expressed when  
172 compared to the expression under osmotic stress exposure only. A similarly large differentially  
173 expressed gene pool is observed in the case of cells exposed to oxidative stress prior to acidic stress,  
174 which also is the only cross-vulnerability observed, where the list of DEGs goes over 750 genes, arguing  
175 for the cell's need to enact a different expression program than the one used in the first stress in order to  
176 survive, which concords with a fitness disadvantage. In the 20 most significant DEGs (**Supplementary**  
177 **Table S8, Supplementary File S2**) there are several up-regulated genes previously described to be  
178 differentially expressed different stresses like acidic (*yjeI*,<sup>50</sup>), manganese (*hflX*,<sup>51</sup>), cobalt (*iscR*,<sup>52</sup>)  
179 cadmium (*tyrA*,<sup>53</sup>) and oxidative (*pfkA*,<sup>49</sup>). In the inverse case, there is a cross-stress protection from

180 acidic to oxidative and transcriptional profiling shows only 10 DEGs compared to the acidic grown  
181 bacteria that contains acidic related genes (*hdeB*, *gadB*, *hyaB*).

182

### 183 **Dissecting the memory imprint after adaptation to sequential stress combinations.**

184 Osmotic and *n*-butanol adapted cells demonstrate strong cross-stress protection both in the case of a  
185 short 12h exposure (**Figure 2A**) and adaptation after 500 generations<sup>39</sup>. However, contrary to past  
186 results on adapted cells, where cross-protection has been found to be symmetrical, only bacteria exposed  
187 to *n*-butanol are protected from osmotic stress which argues for the existence of directionality of this  
188 phenomenon. To assess this hypothesis, we evolved osmotic and *n*-butanol adapted strains for an  
189 additional 500 generations in five independent experiments, all combinations of these environments, to  
190 further address questions related to cross-stress behavior after sequential stress adaptation  
191 (**Supplementary Table S9**). Growth rates of all the populations in media-only, osmotic stress and *n*-  
192 butanol showed that there was no growing defects after evolution (**Supplementary Figures S4-6**,  
193 **Supplementary Table S10, Supplementary File S3**).

194

195 The first hypothesis we tested is whether exposure to two stresses sequentially provides an advantage in  
196 an environment where both are present. We performed competition assays in an environment with both  
197 stresses (0.3mM NaCl and 0.6% *n*-butanol) between populations evolved for 1000 generations in a  
198 single stress (O1000, B1000) against those evolved in both stresses sequentially for 500 generations  
199 (O500B500, B500O500). Results show a significant fitness increase of the strains that have been  
200 exposed to both stresses (O500B500 *vs* B1000,  $DF = 1.16 \pm 0.08$ ; B500O500 *vs* O1000,  $DF = 1.24 \pm$   
201  $0.12$ ) (**Figure 4A, Supplementary Table S11, Supplementary File S4**). This *memory effect* is present  
202 long after the selection pressure for this particular stressor was removed (500 generations) and it can be  
203 attributed to the genetic background that has been acquired during the adaptation in the first stressor. In  
204 addition, this fitness increase is sufficiently large to overcome the additional fitness increase that is  
205 observed in the O1000/B1000 strains when compared to their O500/B500 counterparts due to their  
206 prolonged stress adaptation ( $DF = 1.12 \pm 0.03$ ,  $p\text{-value} < 7.15 \cdot 10^{-3}$ ).

207

208 Recent theoretical results show that the rate of evolution can be increased by guiding populations from  
209 states that are correlated and have increasing complexity<sup>54</sup>. To challenge this notion in the case of  
210 osmotic and *n*-butanol adaptation, we competed populations evolved sequentially in both environments



211 to those evolved in only one stress. In both cases the population evolved for a prolonged duration in a  
212 single stressor had similar or higher fitness than populations evolved in the two stressors sequentially  
213 (O500B500 vs. B1000,  $DF = 1.03 \pm 0.02$ ,  $p\text{-value} < 0.58$ ; B500O500 vs. O1000,  $DF = 0.87 \pm 0.01$ ,  $p\text{-}$   
214  $value < 7.54 \cdot 10^{-11}$ ). Concomitantly, we investigated if the order in which stressors are introduced play a  
215 role on the final fitness. We found that order does not have a significant impact to the fitness of the final  
216 populations when it is measured under competition in either stress (O500B500 vs. B500O500,  $DF =$   
217  $0.99 \pm 0.11$ ,  $p\text{-value} < 0.99$  in *n*-butanol stress;  $DF = 0.99 \pm 0.010$ ,  $p\text{-value} < 0.88$  in osmotic stress).

218

219 We further probed on the environment's impression on the genetic blueprint by investigating whether  
220 mutations are reversed when the stressor is removed. As such, populations that were adapted to  
221 environments for 500 generations with either *n*-butanol or osmotic stress (B500 and O500 populations,  
222 respectively) were competed to those where the initial 500 generations of stress-adaptation is followed  
223 by another 500 generations where the stressor is removed (medium-only environment; B500G500 and  
224 O500G500 cell lines). In the case of *n*-butanol, there is no significant difference in the Darwinian fitness  
225 when populations are competed under *n*-butanol stress (B500 vs. B500G500,  $DF = 0.99 \pm 0.01$ ,  $p\text{-value}$   
226  $< 0.34$ ), while in the case of osmotic stress, the difference is profound in competition under osmotic  
227 stress, as beneficial mutations that are advantageous in osmotic stress have been lost (O500 vs.  
228 O500G500,  $DF = 0.79 \pm 0.01$ ,  $p\text{-value} = 8.30 \cdot 10^{-6}$ ). In both cases, growth in media without the presence  
229 of stress was not affected ( $DF = 1.05 \pm 0.04$ ,  $p\text{-value} = 0.39$ ;  $DF = 0.97 \pm 0.03$ ,  $p\text{-value} = 0.44$ ).

230

231 Finally, to investigate the effect of alternating stresses to the evolutionary trajectory of each population,  
232 we evolved the O500 and B500 populations to alternating environments of osmotic and *n*-butanol stress  
233 (50 generations per environment, 10 switching events total; O500BO50 and B500OB50 cell lines).  
234 These populations have been competed with O500B500 and B500O500, respectively, in three distinct  
235 environments: *n*-butanol, osmotic stress and a varying environment with 8 hours for each stresses  
236 (**Figure 4A**). We did not observe any difference in the growth curves and competition assays between  
237 any of the populations grown in varying and static environments (B500OB50 and O500BO50 vs. B500  
238 and O500 respectively; **Supplementary Table S11**).

239

## 240 **Acquired genetic mutations and their effect to phenotypic fitness during short-term evolution**

241 Previous studies on the effect of single stress adaptation to cross-stress behavior have been focused on  
242 the identification of mutations on one cell line over short timeframes<sup>39</sup>. To further elucidate the genetic  
243 basis of the acquired stress resistance and cross-stress behavior, we first sequenced four cell lines for  
244 each of the four of the stressors (osmotic, *n*-butanol, acidic and oxidative; alkaline stress was excluded  
245 because of media incompatibility) and the control environment (4 biological replicates, 5 environments,  
246 20 lines total), where we have identified a number of loci that are mutation hotspots over two or more  
247 cell lines (**Figure 4B, Supplementary Table S12**).

248

249 Across all lines, two mutations were found to be synonymous, *ynfL* (G500) and *cydD* (O500)  
250 (**Supplementary Table S13**). The predominant mutations are in the intergenic zones *rph:pyre* (G500,  
251 P500, H500) and *fes:fepA* (O500, B500), as well as the sigma factors *rpoB* and *rpoC* (G500, O500,  
252 B500, H500). Interestingly, both *fes* and *fepA* are involved in siderophore enterobactin production that  
253 has recently been found to be linked with oxidative stress and M9 growth<sup>55</sup>. Although its function is  
254 unknown, mutations in *rph:pyrE* have also appeared in a previous study in evolution on lactate<sup>56</sup>. Both  
255 *rpoB* and *rpoC* encode for RNA polymerases and their mutations are very usual in evolution, more  
256 specifically mutations in *rpoB* have been linked to an increased evolvability and fitness<sup>57</sup> and mutations  
257 in *rpoC* to bacterial growth optimization in minimal media<sup>58</sup> and metabolic efficiency<sup>59</sup>. We also found  
258 mutations in other genes already described like *pykF* in G500 which mutation is known to be beneficial  
259 for growth in M9<sup>57</sup>, *marC* and *acrAB* for resistance in *n*-butanol<sup>39,60,61</sup>, *proV* in osmotic stress<sup>39,46,47</sup>;  
260 *evgS* and *rpoD* in acidic stress<sup>39,42,62</sup> and *katG*, *oxyR*, *rsxD* and *ccmD* for resistance in oxidative stress  
261<sup>39,63,64</sup>. Interestingly, in oxidative stress we find mutations in the *yagA* and *yncG* genes, which is  
262 consistent with a previous finding that a deletion between *argF-lacZ* (that includes *yagA*) confers a high  
263 hydrogen peroxide resistance<sup>65</sup>. In addition, *yncG* is homologous to Glutathione S-transferases known  
264 to help in the defense against oxidative stress<sup>66</sup>. Other mutations with unclear importance in the stress  
265 where they appeared that were found are *ybcS*, *lon* and *prc* in G500; promoters of *yccF*, *ychF* and *pgi*  
266 and genes *rob* and *relA* in B500; *yijO* in O500; *lon* in P500; and *motB*, *yigA* and the intergenic zone  
267 *panC:panB* H500. The mutations in the *ybcS*, *prc*, *yccF* and *yigA* genes are of unknown function, while  
268 others have known, but unrelated functions. For example, *lon* is a DNA-binding protease that degrades  
269 abnormal proteins<sup>67</sup>, *ychF* is a ribosome binding catalase<sup>68</sup>, *pgi* is an oxidative stress induced gene<sup>69</sup>,

270 *rob* is a transcriptional activator involved in antibiotic resistance <sup>70,71</sup>, *relA* synthesizes ppGpp, an  
271 alarmone active under aminoacid starvation conditions <sup>72</sup> and *motB* is part of the flagellar motor <sup>73</sup>.

272

273 We performed a similar re-sequencing analysis in the case of populations that have been evolved for a  
274 total of 1000 generations in a single or multiple sequential stress combinations (sequencing of multiple  
275 clones per population; **Supplementary Figure S7, Tables S14-16**). Four mutations were found to be  
276 synonymous and hence neutral, *paaH* (B500O500), *flgK* (O500B500), *fixB* in (O500G500) and *ynfL*  
277 (O500BO50). As shown in **Figure 4B**, the most common mutations are in the *fepA:fes* and *rph:pyrE*  
278 intergenic regions (8 and 7 cell lines, respectively) and mutations in the *rpoB* and *rpoC* genes (7 and 6  
279 cell lines, respectively; **Table 1**). Many of these targets are mutation hotspots (**Supplementary Table**  
280 **S16**), for example in the case of *rph:pyrE* and *fepA:fes*, parallel mutations have been detected in 9  
281 positions that span 140 nucleotides (**Figure S8**) and 3 positions over 22 nucleotides (**Figure S9**)  
282 respectively. Populations of the B500 parental population contained several genes present in more than  
283 one population, *marC*, *acrA*, *acrB*, *relA*, *glyXVY*, with *valZ:lysY*. *marC* and *acrAB* have been previously  
284 described to be involved in *n*-butanol resistance <sup>39,60,61</sup> along with *nagA*. In contrast, populations evolved  
285 from the O500 background have only two common mutagenized loci present: *proV* described to be  
286 involved in osmotic resistance <sup>39,46,47</sup> and *nagA* present in osmo-tolerant cells <sup>35</sup>.

287

288 To decipher the genetic basis of this reversal, we compared the sequences of the B500 and O500 clones  
289 (**Figure 4A**) to those from B500G500 and O500G500 populations, respectively (**Supplementary**  
290 **Figure S7**). Cells that were first evolved in *n*-butanol and then adapted to stress-free media for 500  
291 generations lost the *rpoB* mutation while acquired mutations in *pykF*, *gltD* and *gltB* genes. Similarly,  
292 cells that were first evolved in osmotic stress and then to stress-free media lost the mutation to the  
293 osmoprotectant gene *proV* and acquired mutations in the *pyrE:rph tap*, *yeiP* and *pykF* clusters. Although  
294 its function is unknown, mutations in *pykF* gives an advantage for growth in M9 <sup>57</sup>. Both *gltD* and *gltB*  
295 encode genes for glutamate synthesis <sup>74</sup>, *tap* produces a methyl-accepting protein <sup>75</sup> and *yeiP* is an  
296 elongation factor.

297

298 To associate genotype-to-phenotype, we performed growth experiments of single-knockout mutants <sup>76</sup>  
299 in medium-only, *n*-butanol and osmotic stress (**Supplementary Table S17, Supplementary Figure**  
300 **S10, Supplementary File S3**). Mutants in *pyrE* and *fes* cannot grow in any of the conditions tested,

301 showing that the mutations found in their promoter affect the growth in M9 and are not involved in the  
302 stress adaptation. While mutation in *fepA* affects growth in all media, it provides a higher maximum  
303 growth rate in osmotic stress (**Supplementary Table S17**, media-only  $\mu_{\max} = 0.011 \pm 0.000$ ; *n*-butanol,  
304  $\mu_{\max} = 0.014 \pm 0.001$ ; osmotic,  $\mu_{\max} = 0.020 \pm 0.000$ ). As previously described,  $\Delta pykF$  enhances fitness  
305 in media-only<sup>57</sup>,  $\Delta acrA$  and  $\Delta acrB$  in *n*-butanol<sup>39,60</sup> and  $\Delta proV$  in osmotic stress<sup>46,47</sup>. Other mutations  
306 that have a positive effect are  $\Delta relA$  and  $\Delta sufE$  in media-only,  $\Delta yjbl$  in *n*-butanol and  $\Delta acrA$  in osmotic.  
307 Previous results of repaired mutations under the mutant background elucidated the effect of *acrA*  
308 mutations in osmotic stress<sup>39</sup>. Cross-stress trade-offs were found in the case of  $\Delta nagA$  and  $\Delta sufE$  that  
309 have a negative effect under osmotic stress. In contrast, no mutation was found to have a negative  
310 effect in growth under the absence of any stressor, or in presence of *n*-butanol.

311

## 312 **Functional and network analysis of cross-stress behavior**

313 Re-sequencing and transcriptional profiling data were compiled in order to produce a network  
314 representation of stress resistance in *E. coli* (**Figure 5A, Supplementary Figure S11**). Network and  
315 functional analysis was also performed for each individual stress (**Supplementary Figures S12-S15**).  
316 Overall, enriched gene ontology clusters are related to motility, sulfur metabolic process, translation,  
317 DNA replication and cellular respiration, among others (**Figure 5A and B**). Interestingly, the  
318 glycolysis/gluconeogenesis, response to drug genes and cellular respiration are involved in *n*-butanol  
319 response, with an *pykF* mutant from this pathway being unexpectedly fit, as it has the highest growth  
320 rate in these conditions. The importance of the *fes* and *fesA* genes of the Metal Iron Binding pathway is  
321 profound in the case of osmotic and oxidative stress and similar results have been obtained in the case of  
322 *fepA* iron transporter, in *n*-butanol, osmotic and acidic stress, highlighting the importance of metal  
323 transport in stress response. In osmotic stress, several translation and transcription pathways are found to  
324 be involved, while in acidic stress regulation of transcription and cell cycle clusters are enriched. The  
325 metal binding motif also includes a differentially expressed gene, *yhjA*, that encodes for a cytochrome C  
326 peroxidase regulated by FNR and OxyR<sup>48</sup>. This gene is been implicated in all stress responses and  
327 hence is an excellent target for further characterization. In this stress we also find motility genes  
328 involved in bacterial chemotaxis. In our analysis, a core network was identified with DEGs and  
329 mutations from every stress (33% *n*-butanol, 19% osmotic, 15% acidic and 33% oxidative). The fact that  
330 the members of the central clusters are all implicated in the acidic and osmotic stress correlates well

331 with the previously shown *cross-stress plots* in which we showed that exposure to acidic and osmotic  
332 stresses have the higher cross-stress protection.

333

## 334 **Discussion**

335 A general observation that stems from our work is that exposure of a bacterial population to one stressor  
336 is generally beneficial, as 18 out of 25 cases tested in this work showed cross-stress protection with an  
337 average Darwinian Fitness of  $1.08 \pm 0.01$  ( $p$ -value  $< 5.52 \cdot 10^{-8}$ ). Interestingly, we also found the first  
338 case of cross-vulnerability when bacteria adapted to oxidative stress face low pH suggesting that some  
339 stress combinations can be used for a better sterilization. By performing transcriptional profiling we  
340 found that the number of differentially expressed genes across stresses is a good predictor of the  
341 underlying cross-stress behavior. Indeed, the case of cross vulnerability has the higher number of DEGs  
342 ( $>750$ ), followed by the neutral cross-stress ( $>100$ ) and finally both cases of cross-protection have a  
343 small amount of DEGs (9 and 10). Although the results here support this hypothesis, cross-stress  
344 protection can be also dependent on the DEGs of the first stressor as we find several genes with  
345 unknown or unrelated function, including the putative transcriptional repressor *rpiR*, the *yfi* operon and  
346 genes *pqqL* and *ybaT* that are present in all stresses but acidic (**Fig. 3, Supplementary file S2**). These  
347 genes constitute excellent targets for further experimentation to understand the mechanism under which  
348 they affect single stress and cross-stress behavior. Additionally, we identified several genes known to be  
349 differentially expressed under anaerobic conditions, which provide a clear link between genes induced  
350 by anaerobic respiration and stress resistance<sup>77</sup>.

351

352 There is substantial similarity of the cross-stress behavior between *n*-butanol and osmotic stress, as well  
353 as a clear dissimilarity of these responses to that of oxidative stress with and without evolution. Analysis  
354 of the mutations found in the 4 clones sequenced (B500 and O500, **Figure 4A**) discovered two genes in  
355 the *n*-butanol evolved populations that are also involved in oxidative stress that might be related with  
356 this differential behavior, the *ychF* catalase<sup>68</sup> and the *pgi* gene that are induced under oxidative  
357 conditions<sup>69</sup>. Although not directly related to oxidative stress, in these clones we also found a mutation  
358 in the *rob* gene involved in antibiotic resistance<sup>70</sup>. Unpredictably, in the O500 clones only one mutation  
359 is not related to the media, a mutation of the gene *yijO* which is of unknown function and remains to be

360 investigated. Another explanation of the cross stress vulnerability is the *fepA:fes* mutation that, although  
361 it is expected to be related to the use of M9 as evolution media, it is only present in the B500 and O500  
362 populations. The corresponding proteins belong to the enterobactin operon and have been recently  
363 implicated in growth under oxidative stress in M9 media<sup>55</sup> and thus its mutation might have a  
364 significant effect in M9 with oxidative stress.

365

366 If we are to predict where mutations will occur under evolution in a specific stress, it is reasonable to  
367 assume that the genes that are differentially expressed in that given stress will be likely candidates for  
368 polymorphisms or silencing. Comparison of the transcriptional profiles after short-term exposure and re-  
369 sequencing of evolved populations after 500 and 1000 generations argue that, in general, this hypothesis  
370 is not correct, as differential expression under exposure in a single stressor is not a proxy for mutation  
371 events during evolution in that stressor. Only in the case of osmotic stress we observe a mutation in the  
372 gene *proV* after evolution, which is in the same operon as the *proX* gene that was found to be over-  
373 expressed after the 12h exposure. Interestingly, after 1000 generations under *n*-butanol stress a mutation  
374 in *relA* appears and by network analysis we show that this gene is very close to several DEGs described  
375 in this stress like *gadE*, *mdtE* and *mdtF*. A similar case exists in oxidative stress where we detected a  
376 mutation in the intergenic region between *panB* and *panC*, with the network analysis showing that these  
377 genes have several interactions with other oxidative stress specific DEGs, such as *dnaJ*, *hypD* and *lolB*.

378

379 The evolved cell lines provide an interesting view of the evolutionary trajectories under the various  
380 stress combinations and it shows that their diversity is environment-specific. As shown in Figure 4B,  
381 cell populations that evolved under osmotic stress share few genetic mutations while populations  
382 evolved under *n*-butanol stress share many. Interestingly, despite the already described *n*-butanol related  
383 mutations, *acrA*, *acrB* and *marC*, we also found point mutations in several regions between tRNAs,  
384 *metW:metV*, *valZ:lysY*, *glyC:glyY* and *valT:lysW*. Mutations in four different spots argue against this  
385 being a random effect, which in turn implicates the tRNA production as a factor of *n*-butanol stress  
386 resistance. An expected result is the high abundance of mutations in the *fes:fepA* genes in all the  
387 populations as we already described this mutations in the parental population, B500 and O500. These  
388 mutations have been already described in similar scenarios and recently the involvement of the *fep*  
389 operon in growth in M9<sup>39,55,56</sup>. Surprisingly, another widely present mutation, *pyrE:rph*, is only present  
390 in the population evolved for 500 generations in a stress-free M9 medium, which argues for the *fes:fepA*

391 mutation to be stress-related. We can track the emergence of the most common mutations by the number  
392 of polymorphisms detected in each mutation, for example the *fes:fepA* mutations appears in three  
393 different positions (**Supplementary Figure S9**) for the B500 and O500 populations. In the case of  
394 *rph:pyrE*, we have 9 distinct mutation positions (12 different mutations **Supplementary Figure S8**)  
395 arguing for the emergence of these mutations in the last 500 generations of the evolution. In addition,  
396 based on our results, we cannot conclusively dismiss or confirm the guided-evolution hypothesis  
397 although the O500B500 and B500O500 cell lines were found to have similar fitness to the 1000  
398 generation populations, B1000 and O1000, in *n*-butanol and osmotic stresses, respectively (**Figure 4A**).  
399 This was surprising as the O500 and B500 have a significantly lower fitness with respect to their 1000  
400 generation counterparts.

401

402 Finally, our last experiment involved fitness in a varying environment. More experimentation and in  
403 larger scale is needed to state with high confidence the magnitude and occurrence of this phenomenon.  
404 A recent work was also inconclusive regarding this phenomenon in *S. cerevisiae*<sup>31</sup> with five times  
405 shorter cycles (approximately 10 generations per cycle). We also tested the hypothesis that shorter lag  
406 phases, instead of better fitness, should be observed under evolution in varying environments (New *et al*,  
407 2014). Comparison of the  $\mu_{\max}$  of the varying environments population (**Supplementary Table S10**)  
408 shows that the O500BO50 general fitness is better than the O500B500 in osmotic stress (0.064 *vs.*  
409 0.0525) but not in *n*-butanol (0.041 *vs.* 0.0375). In the case of the B500OB50 populations, a higher  $\mu_{\max}$   
410 in osmotic stress than the B500O500 (0.0575 *vs.* 0.052) and a similar growth in *n*-butanol stress (0.039  
411 *vs.* 0.043) was observed.

412 Although cross-stress behavior has been extensively studied in the past years, with many such cases  
413 related to food safety<sup>78</sup> and human health<sup>79</sup> this is one of the first studies where genome-wide profiling  
414 and a systems biology approach was used to create a comprehensive mapping of static and evolved  
415 cross-stress responses. This approach allows us to investigate the systemic response and molecular  
416 underpinnings of each condition combination, with the potential to inform new sterilization techniques  
417 and more efficient methods in clinical decision support<sup>80</sup>.

418

419

420 **Acknowledgements**

421 We would like to thank Athanasios Tsoukalas for his help with identifying the aminoacid effect of  
422 mutation events. This work was supported by NSF awards 1244626, 1254205 and DoD Army Research  
423 Office award W911NF1210231-0.

424

425 **Author Contributions**

426 VZ performed cross-stress experiments, growth curves, strain characterization, and library preparation  
427 for genome sequencing and RNA-Seq. SQS performed the strain evolution and performed competition  
428 assays for validating the fitness of the populations. MK analyzed the sequences and the DEGs. NR  
429 performed the libraries for the X500 clones. VZ and IT evaluated data and prepared the manuscript. IT  
430 conceived of the study and supervised all aspects of the project.

431

432 **Conflict of Interest**

433 The authors declare no competing interests.

434



## 435 **Materials and methods**

436 **Bacterial strains and culture conditions.** *E. coli* MG1655 and MG1655  $\Delta lacZ$  strains were used in all  
437 experiments of this study. The inclusion of  $\Delta lacZ$  mutants allowed us to perform competition assays  
438 using X-Gal and IPTG staining. The neutrality of the  $\Delta lacZ$  mutation was confirmed in all environments  
439 in a previous work of the laboratory<sup>39</sup>. Minimal M9 salt medium with 0.4% (w/v) glucose as carbon  
440 source was used for cross-stress behavior competition assays. The stresses used are osmotic stress (0.3M  
441 NaCl), acidic stress (pH 5.5), alkaline stress (pH 9.0), oxidative stress (100 mM H<sub>2</sub>O<sub>2</sub>), *n*-butanol stress  
442 (0.6% *n*-butanol), and control (no-stress).

443 **Cross-stress behavior analysis.** Two competing populations (*E. coli* MG1655 and *E. coli* MG1655  
444  $\Delta lacZ$ ) were pre-adapted to M9 overnight and inoculated at an approximate 1:50 ratio at a starting OD<sub>600</sub>  
445 0.004 in M9 with one stressor and only M9 for reference. After 12 h of growth, the same quantity of the  
446 strain adapted to stress and the strain grown in M9 were diluted in the second condition media (approx.  
447 1:100 dilution) and competed for additionally 12 h. Samples were taken at 12 (time 0) and 24 hours  
448 (time 1). Four independent biological replicates each with two technical replicates were performed for  
449 each individual competition. Cell counts were determined on LB agar plates containing 0.25mM IPTG  
450 (Isopropyl  $\beta$ -D-1- thiogalactopyranoside) and 40 mg/ml X-gal (bromo-chloro-indolylgalactopyranoside).  
451 Plates were incubated at 37°C overnight. Darwinian Fitness (DF) was calculated as described in the  
452 Supplementary Methods section.

453 **Gene expression analyses.** Cells were harvested at time 0 and 1. In all, 3ml aliquots were harvested and  
454 mixed with 1.5 ml 5% Phenol/ethanol (v/v) and stored at 80C until use. RNA was extracted using an  
455 RNeasy kit (Qiagen) and after first- and second strand cDNA synthesis, cDNA was broken using  
456 Diagenode Bioruptor NGS. End repairing, A tailing, linker ligation and PCR enrichment was made  
457 using the KAPA Library Preparation Kit (Kapa Biosystems). Size selection was performed with  
458 Agencourt AMPure XP (Beckman Coulter). After quality control, libraries were sequenced by Illumina  
459 HiSeq 2500. The low-quality raw reads were trimmed using Trimmomatic (v0.30) with default settings.  
460 Trimmed reads were aligned on most recent reference genome of *E. coli* MG1655 by using TopHat  
461 (v2.0.10) coupled with bowtie (v1.0.0)<sup>27,81</sup>. The identification of the differentially expressed gene was  
462 done as explained in the Supplementary Methods.

463 **Adaptive Laboratory Evolution.** Evolutionary adaptation experiments were performed in 10 ml  
464 volume in 125 ml shake flasks at 37°C on an orbital shaker at 150 r.p.m. of an alternate of M9 with 85  
465 mM NaCl (evolution media)media-only or with two stressors: osmotic stress (0.3M NaCl) and *n*-butanol  
466 stress (0.6% *n*-butanol). The OD<sub>600</sub> of each culture was measured each day before the daily transfers to  
467 ensure that the estimated nine generations per day were reached (see Supplementary Methods).

468

469 **Whole-genome re-sequencing and mutation discovery of evolved strains.** Selected clones were  
470 grown on LB medium overnight and genomic DNA (gDNA) was isolated using a Wizard Genomic  
471 DNA Purification Kit (Promega) and sequenced as described in the Supplementary Methods.

472

473 **Competition assays.** Competing populations (*E. coli* MG1655 and *E. coli* MG1655  $\Delta$ *lacZ*) were grown  
474 under adaptive conditions overnight and inoculated at an approximate 1:1 ratio at a starting OD<sub>600</sub> 0.004.  
475 Samples were taken at 0h and 24h. Two independent technical replicates were performed for each  
476 individual competition. Cell counts were determined as described before, using LB agar plates  
477 containing 0.25mM IPTG and 40 mg/ml X-. Plates were incubated at 37°C overnight. Darwinian fitness  
478 (*W*) was calculated as described in the Supplementary Methods section. In the case of the population  
479 adapted to a fluctuating media, the populations competed in a fluctuating media that varied from osmotic  
480 to *n*-butanol every 8 hours.

481

482 **Network analysis.** We used TF-DNA binding data from RegulonDB<sup>82</sup> and protein-protein interaction  
483 datasets<sup>83,84</sup> from the Bacterial Protein Interaction database<sup>25</sup> to construct a functional and regulatory  
484 network. We then mapped the results from our re-sequencing and transcriptional profiling analyses to  
485 build condition-specific sub-networks for each stress. Genes that connect either mutated or DE genes in  
486 paths with a path length of three or lower were also included in the network analysis. Modular  
487 organizations and community detection was performed on the resulting networks, through spin-glass  
488 model and simulated annealing techniques<sup>85</sup> using *igraph* R package<sup>81</sup>.

489

490

## 491 References

- 492 1 Storz G, H.-A. R. *Bacterial stress responses*. (American Society for Microbiology, 2000).
- 493 2 Hong, W., Wu, Y. E., Fu, X. & Chang, Z. Chaperone-dependent mechanisms for acid resistance in enteric  
494 bacteria. *Trends in microbiology* **20**, 328-335, doi:10.1016/j.tim.2012.03.001 (2012).
- 495 3 Kanjee, U. & Houry, W. A. Mechanisms of acid resistance in Escherichia coli. *Annual review of*  
496 *microbiology* **67**, 65-81, doi:10.1146/annurev-micro-092412-155708 (2013).
- 497 4 Zhao, B. & Houry, W. A. Acid stress response in enteropathogenic gammaproteobacteria: an aptitude for  
498 survival. *Biochemistry and cell biology = Biochimie et biologie cellulaire* **88**, 301-314, doi:10.1139/o09-  
499 182 (2010).
- 500 5 Bennett, A. F. & Lenski, R. E. An experimental test of evolutionary trade-offs during temperature  
501 adaptation. *Proceedings of the National Academy of Sciences of the United States of America* **104 Suppl**  
502 **1**, 8649-8654, doi:10.1073/pnas.0702117104 (2007).
- 503 6 Riehle, M. M., Bennett, A. F., Lenski, R. E. & Long, A. D. Evolutionary changes in heat-inducible gene  
504 expression in lines of Escherichia coli adapted to high temperature. *Physiological genomics* **14**, 47-58,  
505 doi:10.1152/physiolgenomics.00034.2002 (2003).
- 506 7 Sleight, S. C., Orlic, C., Schneider, D. & Lenski, R. E. Genetic basis of evolutionary adaptation by  
507 Escherichia coli to stressful cycles of freezing, thawing and growth. *Genetics* **180**, 431-443,  
508 doi:10.1534/genetics.108.091330 (2008).
- 509 8 Chiang, S. M. & Schellhorn, H. E. Regulators of oxidative stress response genes in Escherichia coli and  
510 their functional conservation in bacteria. *Archives of biochemistry and biophysics* **525**, 161-169,  
511 doi:10.1016/j.abb.2012.02.007 (2012).
- 512 9 Imlay, J. A. The molecular mechanisms and physiological consequences of oxidative stress: lessons from  
513 a model bacterium. *Nature reviews. Microbiology* **11**, 443-454, doi:10.1038/nrmicro3032 (2013).
- 514 10 Alcantara-Diaz, D., Brena-Valle, M. & Serment-Guerrero, J. Divergent adaptation of Escherichia coli to  
515 cyclic ultraviolet light exposures. *Mutagenesis* **19**, 349-354, doi:10.1093/mutage/geh039 (2004).
- 516 11 Santos, A. L. *et al.* Role of transition metals in UV-B-induced damage to bacteria. *Photochemistry and*  
517 *photobiology* **89**, 640-648, doi:10.1111/php.12049 (2013).
- 518 12 Begley, M., Gahan, C. G. & Hill, C. Bile stress response in Listeria monocytogenes LO28: adaptation,  
519 cross-protection, and identification of genetic loci involved in bile resistance. *Applied and environmental*  
520 *microbiology* **68**, 6005-6012 (2002).
- 521 13 Bergholz, T. M., Bowen, B., Wiedmann, M. & Boor, K. J. Listeria monocytogenes shows temperature-  
522 dependent and -independent responses to salt stress, including responses that induce cross-protection  
523 against other stresses. *Applied and environmental microbiology* **78**, 2602-2612, doi:10.1128/AEM.07658-  
524 11 (2012).
- 525 14 Canovas, D., Fletcher, S. A., Hayashi, M. & Csonka, L. N. Role of trehalose in growth at high temperature  
526 of Salmonella enterica serovar Typhimurium. *Journal of bacteriology* **183**, 3365-3371,  
527 doi:10.1128/JB.183.11.3365-3371.2001 (2001).
- 528 15 Fletcher S.A, C. L. N. Characterization of the induction of increased thermotolerance by high osmolarity  
529 in Salmonella. *Food Microbiology* **15**, 307-317 (1998).
- 530 16 Garren, D. M., Harrison, M. A. & Russell, S. M. Acid tolerance and acid shock response of Escherichia coli  
531 O157:H7 and non-O157:H7 isolates provide cross protection to sodium lactate and sodium chloride.  
532 *Journal of food protection* **61**, 158-161 (1998).
- 533 17 Jenkins, D. E., Chaisson, S. A. & Matin, A. Starvation-induced cross protection against osmotic challenge  
534 in Escherichia coli. *Journal of bacteriology* **172**, 2779-2781 (1990).
- 535 18 Leyer, G. J. & Johnson, E. A. Acid adaptation induces cross-protection against environmental stresses in  
536 Salmonella typhimurium. *Applied and environmental microbiology* **59**, 1842-1847 (1993).

- 537 19 Lou, Y. & Yousef, A. E. Adaptation to sublethal environmental stresses protects *Listeria monocytogenes*  
538 against lethal preservation factors. *Applied and environmental microbiology* **63**, 1252-1255 (1997).
- 539 20 Mattimore, V. & Battista, J. R. Radioresistance of *Deinococcus radiodurans*: functions necessary to  
540 survive ionizing radiation are also necessary to survive prolonged desiccation. *Journal of bacteriology*  
541 **178**, 633-637 (1996).
- 542 21 Pittman, J. R. *et al.* Proteomic Analysis of Cross Protection Provided Between Cold and Osmotic Stress in  
543 *Listeria monocytogenes*. *Journal of proteome research*, doi:10.1021/pr401004a (2014).
- 544 22 Sghaier, H., Narumi, I., Satoh, K., Ohba, H. & Mitomo, H. Problems with the current deinococcal  
545 hypothesis: an alternative theory. *Theory in biosciences = Theorie in den Biowissenschaften* **126**, 43-45,  
546 doi:10.1007/s12064-007-0004-x (2007).
- 547 23 Tesone, S., Hughes, A. & Hurst, A. Salt extends the upper temperature limit for growth of food-poisoning  
548 bacteria. *Canadian journal of microbiology* **27**, 970-972 (1981).
- 549 24 Jenkins, D. E., Schultz, J. E. & Matin, A. Starvation-induced cross protection against heat or H<sub>2</sub>O<sub>2</sub>  
550 challenge in *Escherichia coli*. *Journal of bacteriology* **170**, 3910-3914 (1988).
- 551 25 Goll, J. *et al.* MPIDB: the microbial protein interaction database. *Bioinformatics* **24**, 1743-1744,  
552 doi:10.1093/bioinformatics/btn285 (2008).
- 553 26 Mozhayskiy, V. & Tagkopoulos, I. Microbial evolution in vivo and in silico: methods and applications.  
554 *Integrative biology : quantitative biosciences from nano to macro* **5**, 262-277, doi:10.1039/c2ib20095c  
555 (2013).
- 556 27 Tagkopoulos, I., Liu, Y. C. & Tavazoie, S. Predictive behavior within microbial genetic networks. *Science*  
557 **320**, 1313-1317, doi:10.1126/science.1154456 (2008).
- 558 28 Mozhayskiy, V. & Tagkopoulos, I. Horizontal gene transfer dynamics and distribution of fitness effects  
559 during microbial in silico evolution. *BMC bioinformatics* **13 Suppl 10**, S13, doi:10.1186/1471-2105-13-  
560 S10-S13 (2012).
- 561 29 Berry, D. B. & Gasch, A. P. Stress-activated genomic expression changes serve a preparative role for  
562 impending stress in yeast. *Molecular biology of the cell* **19**, 4580-4587, doi:10.1091/mbc.E07-07-0680  
563 (2008).
- 564 30 Dragosits, M. & Mattanovich, D. Adaptive laboratory evolution -- principles and applications for  
565 biotechnology. *Microbial cell factories* **12**, 64, doi:10.1186/1475-2859-12-64 (2013).
- 566 31 Dhar, R., Sagesser, R., Weikert, C. & Wagner, A. Yeast adapts to a changing stressful environment by  
567 evolving cross-protection and anticipatory gene regulation. *Molecular biology and evolution* **30**, 573-  
568 588, doi:10.1093/molbev/mss253 (2013).
- 569 32 Mao, J., Blanchard, A. E. & Lu, T. Slow and Steady Wins the Race: A Bacterial Exploitative Competition  
570 Strategy in Fluctuating Environments. *ACS synthetic biology*, doi:10.1021/sb4002008 (2014).
- 571 33 New, A. M. *et al.* Different levels of catabolite repression optimize growth in stable and variable  
572 environments. *PLoS biology* **12**, e1001764, doi:10.1371/journal.pbio.1001764 (2014).
- 573 34 Charusanti, P. *et al.* Exploiting adaptive laboratory evolution of *Streptomyces clavuligerus* for antibiotic  
574 discovery and overproduction. *PloS one* **7**, e33727, doi:10.1371/journal.pone.0033727 (2012).
- 575 35 Winkler, J. D., Garcia, C., Olson, M., Callaway, E. & Kao, K. C. Evolved *Escherichia coli* osmotolerant  
576 mutants frequently exhibit defective n-acetylglucosamine catabolism and point mutations in the cell-  
577 shape regulating protein MreB. *Applied and environmental microbiology*, doi:10.1128/AEM.00499-14  
578 (2014).
- 579 36 Zheng, Y. N. *et al.* Problems with the microbial production of butanol. *Journal of industrial microbiology*  
580 *& biotechnology* **36**, 1127-1138, doi:10.1007/s10295-009-0609-9 (2009).
- 581 37 Stephanopoulos, G. Challenges in engineering microbes for biofuels production. *Science* **315**, 801-804,  
582 doi:10.1126/science.1139612 (2007).

- 583 38 Ryu, J. H. & Beuchat, L. R. Influence of acid tolerance responses on survival, growth, and thermal cross-  
584 protection of *Escherichia coli* O157:H7 in acidified media and fruit juices. *International journal of food*  
585 *microbiology* **45**, 185-193 (1998).
- 586 39 Dragosits, M., Mozhayskiy, V., Quinones-Soto, S., Park, J. & Tagkopoulos, I. Evolutionary potential, cross-  
587 stress behavior and the genetic basis of acquired stress resistance in *Escherichia coli*. *Molecular systems*  
588 *biology* **9**, 643, doi:10.1038/msb.2012.76 (2013).
- 589 40 Blasco, F. *et al.* The coordination and function of the redox centres of the membrane-bound nitrate  
590 reductases. *Cellular and molecular life sciences : CMLS* **58**, 179-193 (2001).
- 591 41 King, P. W. & Przybyla, A. E. Response of hya expression to external pH in *Escherichia coli*. *Journal of*  
592 *bacteriology* **181**, 5250-5256 (1999).
- 593 42 Foster, J. W. *Escherichia coli* acid resistance: tales of an amateur acidophile. *Nature reviews.*  
594 *Microbiology* **2**, 898-907, doi:10.1038/nrmicro1021 (2004).
- 595 43 Lin, J., Lee, I. S., Frey, J., Slonczewski, J. L. & Foster, J. W. Comparative analysis of extreme acid survival in  
596 *Salmonella typhimurium*, *Shigella flexneri*, and *Escherichia coli*. *Journal of bacteriology* **177**, 4097-4104  
597 (1995).
- 598 44 Gajiwala, K. S. & Burley, S. K. HDEA, a periplasmic protein that supports acid resistance in pathogenic  
599 enteric bacteria. *Journal of molecular biology* **295**, 605-612, doi:10.1006/jmbi.1999.3347 (2000).
- 600 45 Kern, R., Malki, A., Abdallah, J., Tagourt, J. & Richarme, G. *Escherichia coli* HdeB is an acid stress  
601 chaperone. *Journal of bacteriology* **189**, 603-610, doi:10.1128/JB.01522-06 (2007).
- 602 46 Lucht, J. M. & Bremer, E. Adaptation of *Escherichia coli* to high osmolarity environments:  
603 osmoregulation of the high-affinity glycine betaine transport system proU. *FEMS microbiology reviews*  
604 **14**, 3-20 (1994).
- 605 47 Perroud, B. & Le Rudulier, D. Glycine betaine transport in *Escherichia coli*: osmotic modulation. *Journal*  
606 *of bacteriology* **161**, 393-401 (1985).
- 607 48 Partridge, J. D., Poole, R. K. & Green, J. The *Escherichia coli* yhjA gene, encoding a predicted cytochrome  
608 c peroxidase, is regulated by FNR and OxyR. *Microbiology* **153**, 1499-1507,  
609 doi:10.1099/mic.0.2006/004838-0 (2007).
- 610 49 Chavarria, M., Nikel, P. I., Perez-Pantoja, D. & de Lorenzo, V. The Entner-Doudoroff pathway empowers  
611 *Pseudomonas putida* KT2440 with a high tolerance to oxidative stress. *Environmental microbiology* **15**,  
612 1772-1785, doi:10.1111/1462-2920.12069 (2013).
- 613 50 Kannan, G. *et al.* Rapid acid treatment of *Escherichia coli*: transcriptomic response and recovery. *BMC*  
614 *microbiology* **8**, 37, doi:10.1186/1471-2180-8-37 (2008).
- 615 51 Kaur, G. *et al.* A novel MntR-independent mechanism of manganese homeostasis in *Escherichia coli* by  
616 the ribosome-associated protein HflX. *Journal of bacteriology*, doi:10.1128/JB.01717-14 (2014).
- 617 52 Fantino, J. R., Py, B., Fontecave, M. & Barras, F. A genetic analysis of the response of *Escherichia coli* to  
618 cobalt stress. *Environmental microbiology* **12**, 2846-2857, doi:10.1111/j.1462-2920.2010.02265.x (2010).
- 619 53 Ferianc, P., Farewell, A. & Nystrom, T. The cadmium-stress stimulon of *Escherichia coli* K-12.  
620 *Microbiology* **144 ( Pt 4)**, 1045-1050 (1998).
- 621 54 Mozhayskiy, V. & Tagkopoulos, I. Guided evolution of in silico microbial populations in complex  
622 environments accelerates evolutionary rates through a step-wise adaptation. *BMC bioinformatics* **13**  
623 **Suppl 10**, S10, doi:10.1186/1471-2105-13-S10-S10 (2012).
- 624 55 Adler, C. *et al.* The alternative role of enterobactin as an oxidative stress protector allows *Escherichia*  
625 *coli* colony development. *PLoS one* **9**, e84734, doi:10.1371/journal.pone.0084734 (2014).
- 626 56 Conrad, T. M. *et al.* Whole-genome resequencing of *Escherichia coli* K-12 MG1655 undergoing short-  
627 term laboratory evolution in lactate minimal media reveals flexible selection of adaptive mutations.  
628 *Genome biology* **10**, R118, doi:10.1186/gb-2009-10-10-r118 (2009).

- 629 57 Barrick, J. E., Kauth, M. R., Strelisoff, C. C. & Lenski, R. E. Escherichia coli rpoB mutants have increased  
630 evolvability in proportion to their fitness defects. *Molecular biology and evolution* **27**, 1338-1347,  
631 doi:10.1093/molbev/msq024 (2010).
- 632 58 Conrad, T. M. *et al.* RNA polymerase mutants found through adaptive evolution reprogram Escherichia  
633 coli for optimal growth in minimal media. *Proceedings of the National Academy of Sciences of the United*  
634 *States of America* **107**, 20500-20505, doi:10.1073/pnas.0911253107 (2010).
- 635 59 Cheng, K. K. *et al.* Global metabolic network reorganization by adaptive mutations allows fast growth of  
636 Escherichia coli on glycerol. *Nature communications* **5**, 3233, doi:10.1038/ncomms4233 (2014).
- 637 60 Atsumi, S. *et al.* Evolution, genomic analysis, and reconstruction of isobutanol tolerance in Escherichia  
638 coli. *Molecular systems biology* **6**, 449, doi:10.1038/msb.2010.98 (2010).
- 639 61 Minty, J. J. *et al.* Evolution combined with genomic study elucidates genetic bases of isobutanol  
640 tolerance in Escherichia coli. *Microbial cell factories* **10**, 18, doi:10.1186/1475-2859-10-18 (2011).
- 641 62 Itou, J., Eguchi, Y. & Utsumi, R. Molecular mechanism of transcriptional cascade initiated by the  
642 EvgS/EvgA system in Escherichia coli K-12. *Bioscience, biotechnology, and biochemistry* **73**, 870-878  
643 (2009).
- 644 63 Zheng, M. *et al.* DNA microarray-mediated transcriptional profiling of the Escherichia coli response to  
645 hydrogen peroxide. *Journal of bacteriology* **183**, 4562-4570, doi:10.1128/JB.183.15.4562-4570.2001  
646 (2001).
- 647 64 Farr, S. B. & Kogoma, T. Oxidative stress responses in Escherichia coli and Salmonella typhimurium.  
648 *Microbiological reviews* **55**, 561-585 (1991).
- 649 65 Volkert, M. R., Loewen, P. C., Switala, J., Crowley, D. & Conley, M. The delta (argF-lacZ)205(U169)  
650 deletion greatly enhances resistance to hydrogen peroxide in stationary-phase Escherichia coli. *Journal*  
651 *of bacteriology* **176**, 1297-1302 (1994).
- 652 66 Kanai, T., Takahashi, K. & Inoue, H. Three distinct-type glutathione S-transferases from Escherichia coli  
653 important for defense against oxidative stress. *Journal of biochemistry* **140**, 703-711,  
654 doi:10.1093/jb/mvj199 (2006).
- 655 67 Van Melderen, L. & Aertsen, A. Regulation and quality control by Lon-dependent proteolysis. *Research in*  
656 *microbiology* **160**, 645-651, doi:10.1016/j.resmic.2009.08.021 (2009).
- 657 68 Tomar, S. K., Kumar, P. & Prakash, B. Deciphering the catalytic machinery in a universally conserved  
658 ribosome binding ATPase YchF. *Biochemical and biophysical research communications* **408**, 459-464,  
659 doi:10.1016/j.bbrc.2011.04.052 (2011).
- 660 69 Niazi, J. H., Kim, B. C., Ahn, J. M. & Gu, M. B. A novel bioluminescent bacterial biosensor using the highly  
661 specific oxidative stress-inducible *pgi* gene. *Biosensors & bioelectronics* **24**, 670-675,  
662 doi:10.1016/j.bios.2008.06.026 (2008).
- 663 70 Ariza, R. R., Li, Z., Ringstad, N. & Demple, B. Activation of multiple antibiotic resistance and binding of  
664 stress-inducible promoters by Escherichia coli Rob protein. *Journal of bacteriology* **177**, 1655-1661  
665 (1995).
- 666 71 Martin, R. G. & Rosner, J. L. The AraC transcriptional activators. *Current opinion in microbiology* **4**, 132-  
667 137 (2001).
- 668 72 Wendrich, T. M., Blaha, G., Wilson, D. N., Marahiel, M. A. & Nierhaus, K. H. Dissection of the mechanism  
669 for the stringent factor RelA. *Molecular cell* **10**, 779-788 (2002).
- 670 73 Berg, H. C. The rotary motor of bacterial flagella. *Annual review of biochemistry* **72**, 19-54,  
671 doi:10.1146/annurev.biochem.72.121801.161737 (2003).
- 672 74 Goss, T. J., Perez-Matos, A. & Bender, R. A. Roles of glutamate synthase, *gltBD*, and *gltF* in nitrogen  
673 metabolism of Escherichia coli and Klebsiella aerogenes. *Journal of bacteriology* **183**, 6607-6619,  
674 doi:10.1128/JB.183.22.6607-6619.2001 (2001).
- 675 75 Liu, X. & Parales, R. E. Chemotaxis of Escherichia coli to pyrimidines: a new role for the signal transducer  
676 tap. *Journal of bacteriology* **190**, 972-979, doi:10.1128/JB.01590-07 (2008).

- 677 76 Baba, T. *et al.* Construction of Escherichia coli K-12 in-frame, single-gene knockout mutants: the Keio  
678 collection. *Molecular systems biology* **2**, 2006 0008, doi:10.1038/msb4100050 (2006).
- 679 77 Du, H., Lo, T. M., Sitompul, J. & Chang, M. W. Systems-level analysis of Escherichia coli response to silver  
680 nanoparticles: the roles of anaerobic respiration in microbial resistance. *Biochemical and biophysical*  
681 *research communications* **424**, 657-662, doi:10.1016/j.bbrc.2012.06.134 (2012).
- 682 78 Wesche, A. M., Gurtler, J. B., Marks, B. P. & Ryser, E. T. Stress, sublethal injury, resuscitation, and  
683 virulence of bacterial foodborne pathogens. *Journal of food protection* **72**, 1121-1138 (2009).
- 684 79 Tsoukalas A., A. T., Tagkopoulos I. From data to optimal decision making: A data-driven, probabilistic  
685 machine learning approach to decision support for patients with Sepsis. *JMIR Medical Informatics in*  
686 *press* (2014).
- 687 80 Gultepe, E. *et al.* From vital signs to clinical outcomes for patients with sepsis: a machine learning basis  
688 for a clinical decision support system. *Journal of the American Medical Informatics Association : JAMIA*  
689 **21**, 315-325, doi:10.1136/amiainl-2013-001815 (2014).
- 690 81 Csardi, G. a. N., T. The igraph software package for complex network research. *InterJournal Complex*  
691 *Systems* **1695**, 1695 (2006).
- 692 82 Gama-Castro, S. *et al.* RegulonDB (version 6.0): gene regulation model of Escherichia coli K-12 beyond  
693 transcription, active (experimental) annotated promoters and Textpresso navigation. *Nucleic acids*  
694 *research* **36**, D120-124, doi:10.1093/nar/gkm994 (2008).
- 695 83 Hu, P. *et al.* Global functional atlas of Escherichia coli encompassing previously uncharacterized proteins.  
696 *PLoS biology* **7**, e96, doi:10.1371/journal.pbio.1000096 (2009).
- 697 84 Peregrin-Alvarez, J. M., Xiong, X., Su, C. & Parkinson, J. The Modular Organization of Protein Interactions  
698 in Escherichia coli. *PLoS computational biology* **5**, e1000523, doi:10.1371/journal.pcbi.1000523 (2009).
- 699 85 Traag, V. A. & Bruggeman, J. Community detection in networks with positive and negative links. *Physical*  
700 *review. E, Statistical, nonlinear, and soft matter physics* **80**, 036115 (2009).

701

702

703 **TABLES**

704 **Table 1:** List of mutations that appear in 3 or more populations. Final count of populations is 8.

| <b>Gene</b>      | <b>Frequency</b> | <b>Populations</b>                                                       |
|------------------|------------------|--------------------------------------------------------------------------|
| <i>fepA:fes</i>  | 8                | B1000, B500O500, B500G500, B500OB50, O1000, O500B500, O500G500, O500BO50 |
| <i>rph:pyrE</i>  | 7                | B1000, B500G500, B500OB50, O1000, O500B500, O500G500, O500BO50           |
| <i>rpoB</i>      | 6                | B1000, B500OB50, O1000, O500B500, O500G500, O500BO50                     |
| <i>rpoC</i>      | 6                | B1000, B500OB50, O1000, O500B500, O500G500, O500BO50                     |
| <i>marC</i>      | 5                | B1000, 500O500, B500G500, , O500B500, O500BO50                           |
| <i>glyXVY</i>    | 4                | B1000, B500O500, B500G500, O1000                                         |
| <i>acrB</i>      | 4                | B1000, B500O500, B500G500, O500B500                                      |
| <i>acrA</i>      | 3                | B1000, B500G500, O500B500                                                |
| <i>nagA</i>      | 3                | B1000, O500B500, O500BO50                                                |
| <i>valZ:lysY</i> | 3                | B500O500, B500G500, B500OB50                                             |
| <i>relA</i>      | 3                | B1000, B500O500, B500G500                                                |
| <i>proV</i>      | 3                | B500OB50, O1000, O500B500                                                |
| <i>pykF</i>      | 3                | O1000, O500G500, B500G500                                                |
| <i>sufE</i>      | 2                | O1000, B500OB50                                                          |
| <i>yjbI</i>      | 2                | O1000, B500OB50                                                          |

705



## 706 **Figure Legends**

707

708 **Figure 1. Overview of the experimental approach.** (A) *E. coli* strains (4 biological, 2 technical replicates) were  
709 pre-conditioned in a first stressful (condition 1) or control (condition 2) environment for 12h before they were  
710 exposed to a second stress (condition 3) for an additional 12h. Competition assays, growth curves, genome-scale  
711 transcriptional profiling and functional network analysis was performed to assess the cross-stress behavior of *E.*  
712 *coli* for combinations of five stresses (n-butanol, osmotic, acidic, alkaline and oxidative stress). (B) Sequential  
713 evolution in stressful environments and hypotheses testing related to the adaptive potential of cross-stress  
714 behavior. *E. coli* populations were adapted over 1000 generations under various stresses to assess hypotheses  
715 related to co-protection, guided evolution, order, environmental reversal and varying environments. Genome-wide  
716 re-sequencing was used to map the genotypic landscape and phenotypic characterization was performed through  
717 competition assays and growth curves. Functional and pathway analysis was performed to identify the biological  
718 processes and network neighborhoods that are implicated in the acquired stress resistance

719 **Figure 2: Hard-wired cross-stress behavior in *E. coli*.** (A) Change in Darwinian fitness ( $W$ ) of preconditioned  
720 *E. coli* populations (12h exposure) relative to the WT un-conditioned strain ( $W=1$ ). Each sub-plot represents a  
721 different stressful environment where fitness was assessed through competition assays. Cross-stress protection  
722 ranges from  $1.15 \pm 0.04$  to  $1.02 \pm 0.01$  and cross-stress vulnerability is observed only in the case of *E. coli* strains  
723 pre-conditioned to oxidative stress before exposed to acidic stress ( $0.97 \pm 0.01$ ,  $p\text{-value} = 1.91 \cdot 10^{-4}$ ). Shaded  
724 area depicts the fitness advantage when the population has been conditioned in the same stress. (B) Cross-stress  
725 area plots demonstrate the level of cross-stress protection for each conditioning environment.

726 **Figure 3: Transcriptional profiling in single stressors and cross-stress pairs.** (A) genes differentially  
727 regulated in presence of one stress. (B) expression profiles of the cross-stress behavior. 4 analyses were perform,  
728 from n-butanol to osmotic, from osmotic to n-butanol, from oxidative to acidic and from acidic to oxidative. The  
729 expression profile was compare to a sample grown for 12 hours in M9 and then to the second stress (first column)  
730 and 24 hours in the second stress. Important implicated pathways are highlighted.

731 **Figure 4: Phenotypic and genomic analysis of the populations evolved for 500 and 1000 generations.** (A)  
732 Map of mutations in clones of populations evolved for 500 generations under one stress. Four clones of each  
733 stress were selected by fitness assessment. Mutations are draw relative to the reference genome of MG1655 and  
734 symbolized with a line if SNP and with a triangle if it is an insertion or deletion (upside and downside  
735 respectively). Details of the mutations can be find in Table S4. (B) Venn diagram illustrating the presence of the  
736 mutations in all the populations (Fig S6 and Table S10). (C) Results of the direct competition assays for each of

737 the five hypothesis tested in this study. In all cases two biological replicates were performed (black and grey dots)  
738 but in the case of order in *n*-butanol and reversal of the *n*-butanol mutation in M9 were 6 replicates were  
739 performed.

740

741 **Figure 5. Network analysis and implicated pathways in stress resistance.** (A) A functional network was  
742 constructed from PPI and TF-DNA data, superimposed with the re-sequencing and transcriptional profiling results  
743 of our analyses. Modularity-based algorithms were used to identify communities within the network, which were  
744 further analyzed for enriched clusters. The name of the most statistically significant cluster and the profile of the  
745 mutants/DEGs in terms of the corresponding stress (Butanol, Osmotic, Acidic, Oxidative, in that order) for each  
746 community is shown. For example, in the case of the first community, the Glycolysis GO term is the most over-  
747 represented and 50% of the observed mutations/DEGs in the community were identified in cell lines  
748 exposed/evolved in *n*-butanol. Light pink nodes are genes that are not mutated or DEGs, but connect two or more  
749 mutated/DEG genes in a path with a length shorter than three. (B) Highly enriched pathways and their members  
750 that are implicated in each stress.

751

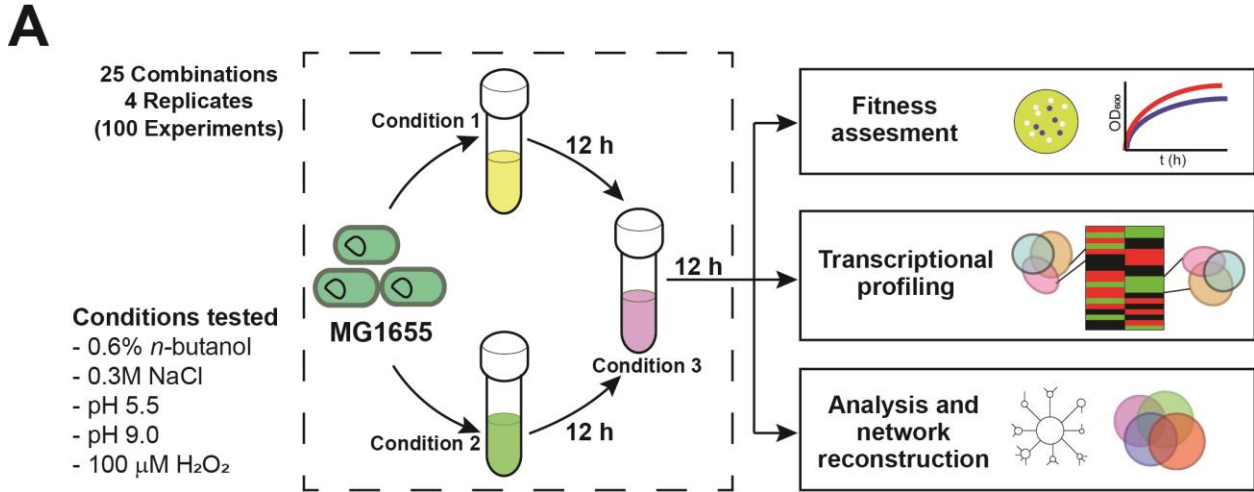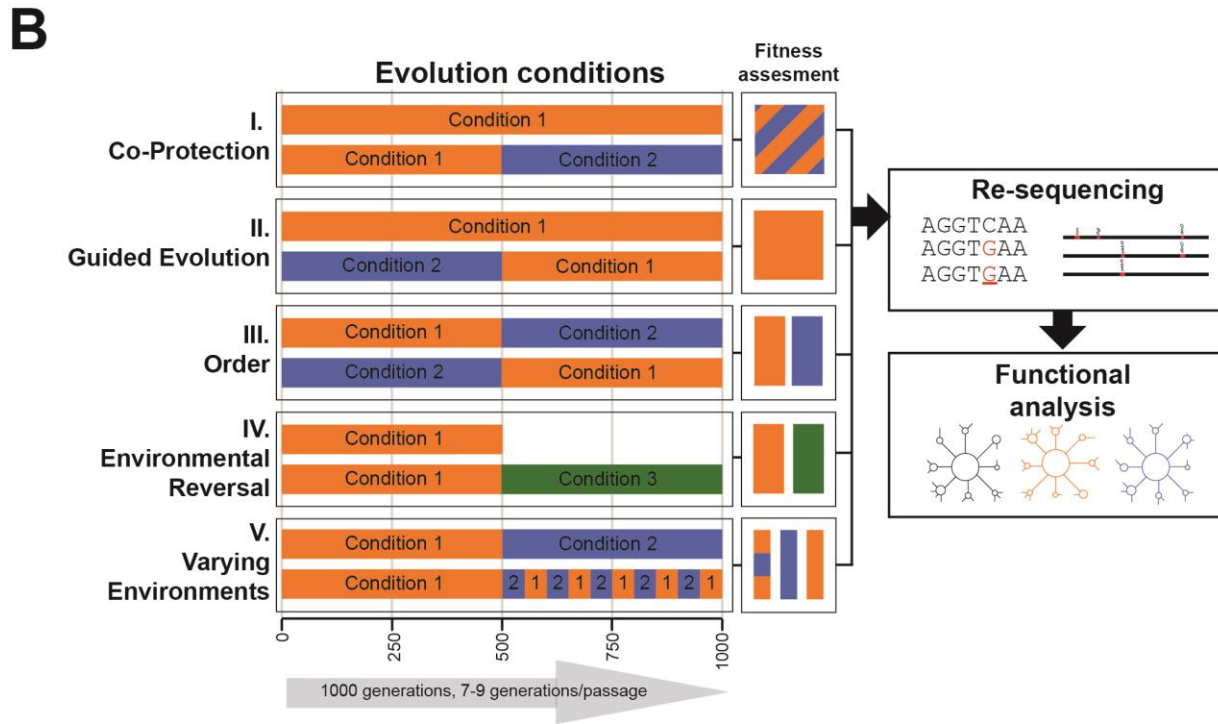

752

753 **Figure 1. Overview of the experimental approach**

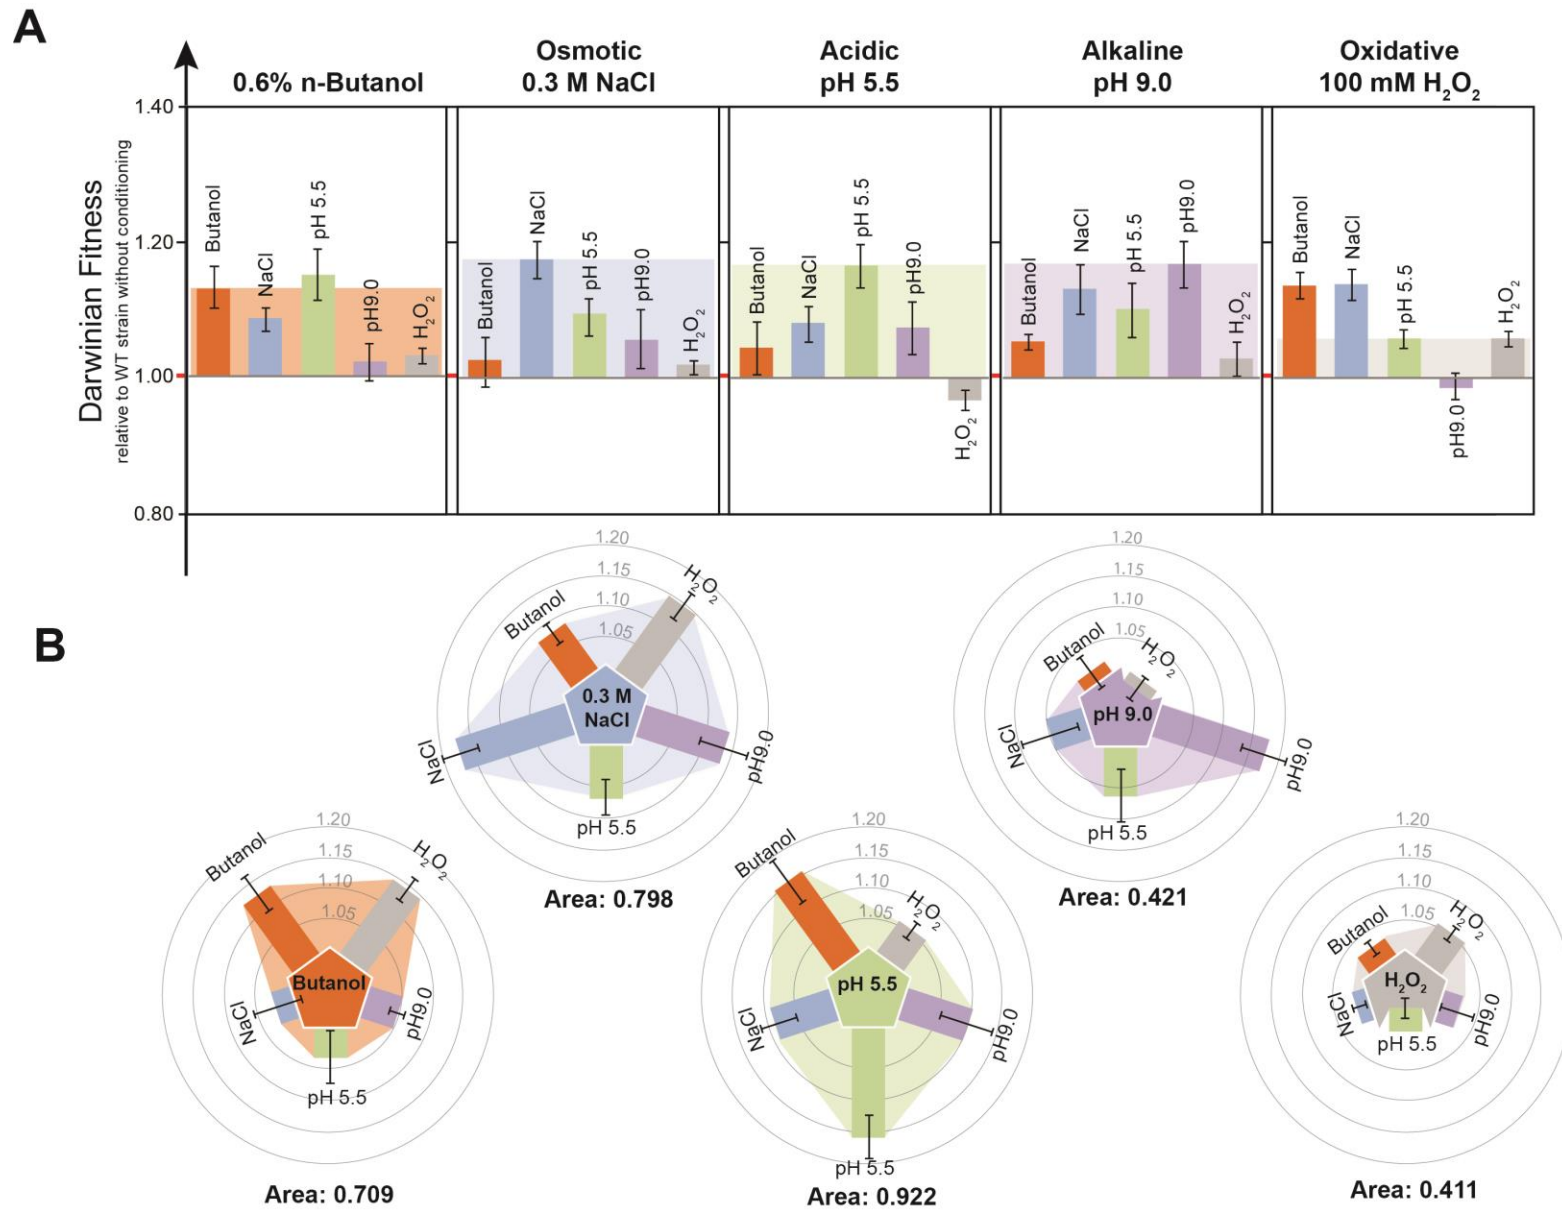

754

755

**Figure 2: Hard-wired cross-stress behavior in *E. coli***



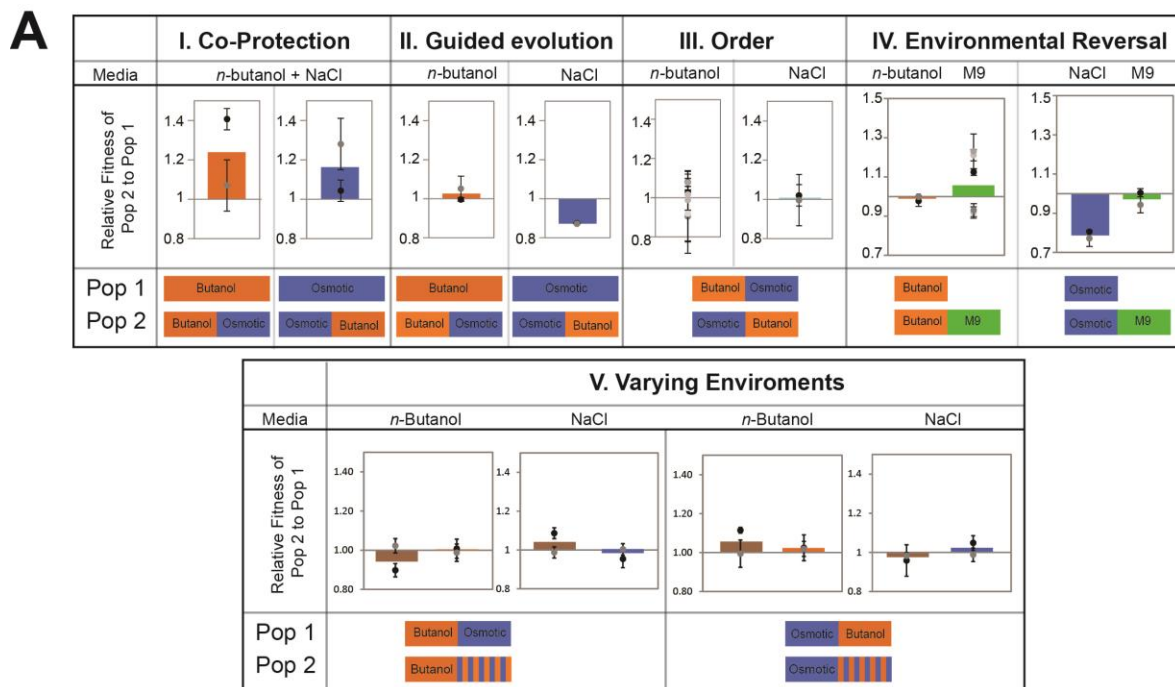

**B**

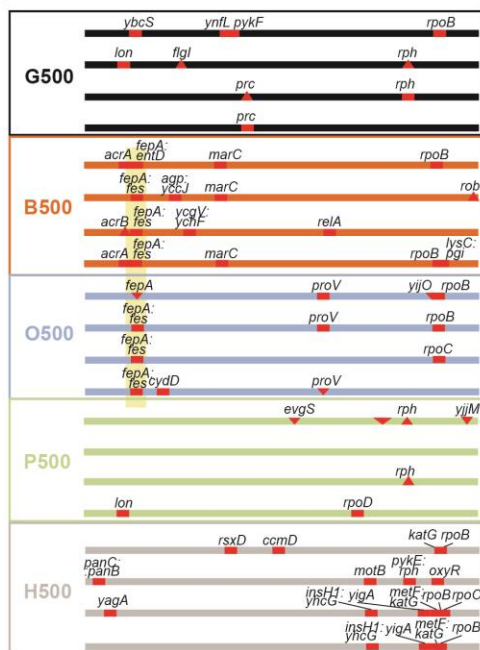

**C**

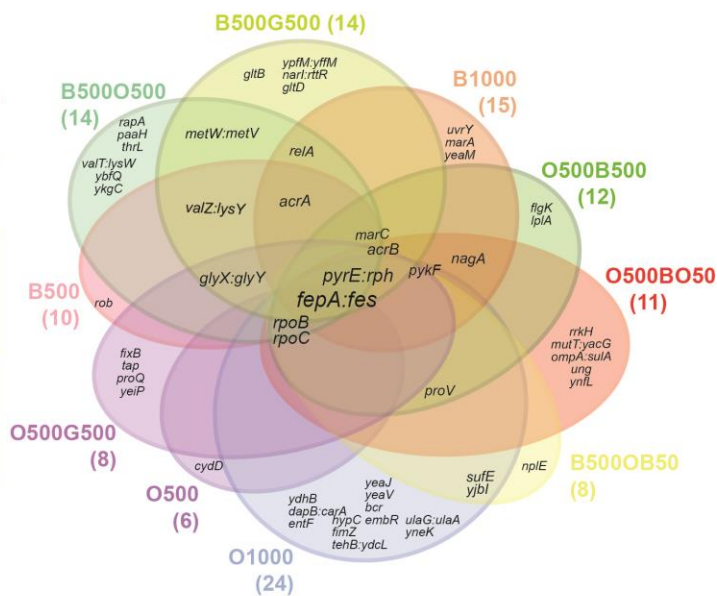

760

761

762

**Figure 4: Phenotypic and genomic analysis of the populations evolved for 500 and 1000 generations.**

763

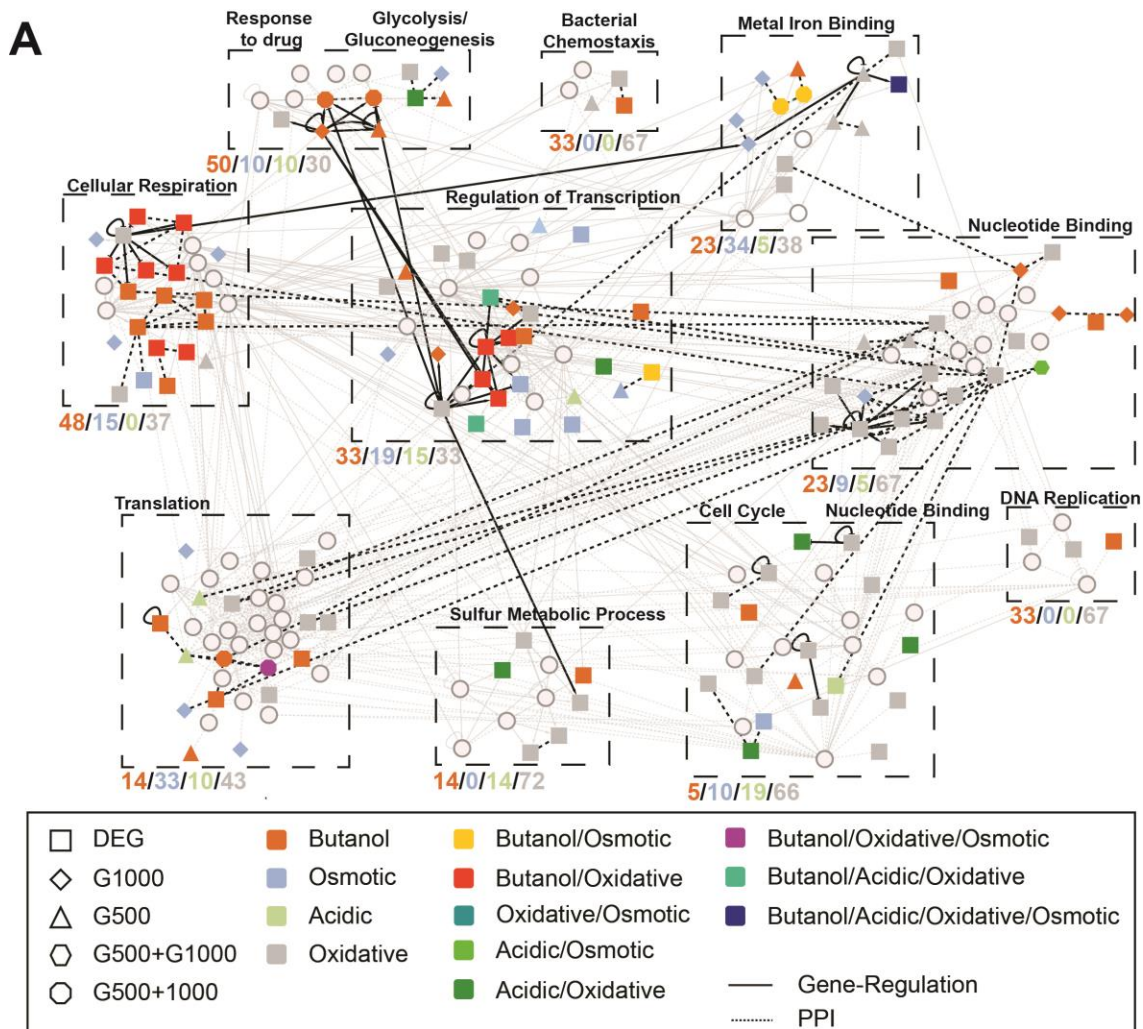

**B**

| Stress            | Pathway                     | Interactors                                                                        |
|-------------------|-----------------------------|------------------------------------------------------------------------------------|
| <i>n</i> -butanol | Response to Drug            | <i>marA, acrB, acrA, acrD</i>                                                      |
|                   | Cellular Respiration        | <i>ubiC, fnr, hyaD, hyaB, hyaB, hyaE, hyaF, hyaA, narL, hyaC, narG, narH, narJ</i> |
|                   | Glycolysis/Gluconeogenesis  | <i>eno, pykF, pfkA, pgj</i>                                                        |
| Osmotic           | Metal Iron Binding          | <i>entD, katG, pyrC, fes, fur, fepA, yhjA</i>                                      |
|                   | Translation                 | <i>rpsM, spsD, rplA, rplM, rplB, rplV, rpmB, rplC, pth, rplC</i>                   |
|                   | Regulation of Transcription | <i>crp, hns, flhC, gadX, evgA, evgS, gadE, phoP, yjM, uxuR</i>                     |
| Acidic            | Regulation of Transcription | <i>crp, hns, flhC, gadX, evgA, evgS, gadE, phoP, yjM, uxuR</i>                     |
|                   | Cell cycle                  | <i>groL, ftsE, ftsA, ftsN, ftsY, murB</i>                                          |
| Oxidative         | Cellular Respiration        | <i>ubiC, fnr, hyaD, hyaB, hyaB, hyaE, hyaF, hyaA, narL, hyaC, narG, narH, narJ</i> |
|                   | Metal Iron Binding          | <i>entD, katG, pyrC, fes, fur, fepA, yhjA</i>                                      |
|                   | Bacterial Chemotaxis        | <i>cheY, cheR, motB, tsr, trg</i>                                                  |
|                   | Nucleotide Binding          | <i>groL, atpA, ftsE, ftsA, lpdA, tyrR, murB, ydiA</i>                              |
|                   | Sulfur Metabolic Process    | <i>clb, cysB, cysU, cysW, tauB, tauC, cysP</i>                                     |

764

765

**Figure 5. Network analysis and implicated pathways in stress resistance.**
